# Supplementary material for: Evaluating the effect of nutrient redistribution by animals on the phosphorus cycle of lowland Amazonia
Source: Copernicus journal article supplement (doi:10.5194/bg-15-279-2018), 2018-01-12
Supplement: Supplementary file 1 [file bg-15-279-2018-supplement.zip]

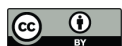

## *Supplement of*

# **Evaluating the effect of nutrient redistribution by animals on the phosphorus cycle of lowland Amazonia**

**Corina Buendía et al.**

*Correspondence to:* Corina Buendía ([coribuendia@gmail.com](mailto:coribuendia@gmail.com))

- [bg-15-279-2018-supplement-title-page.pdf](#)
- [ModeloAmaAnimalsBuendiaetal2018.R](#)

The copyright of individual parts of the supplement might differ from the CC BY 3.0 License.
